# Supplementary material for: Clinical activity of PD-1 inhibition in the treatment of locally advanced or metastatic basal cell carcinoma
Source: PubMed Central journal article supplement — J Immunother Cancer. 2022 May 11;10(5):e004839. doi: 10.1136/jitc-2022-004839 (PMC9096532; doi:10.1136/jitc-2022-004839), 2022-05-11
Supplement: jitc-2022-004839supp003.pdf [file jitc-2022-004839supp003.pdf]

Figure S1: Multivariate Analysis of Clinical Variables and Objective Response to PD-1 Inhibition. Heatmap visualizes Pearson r values, with positive correlations depicted in blue, and negative correlations in red. Improved objective response was not significantly associated with any variables, but showed a trend towards significance with increased albumin ( $p=0.052$ ).

Figure S2: Multivariate Analysis of Clinical Variables and Disease Control Rate with PD-1 Inhibition. Heatmap visualizes Pearson r values, with positive correlations depicted in blue, and negative correlations in red. Improved disease control rate was significantly associated with increased platelets ( $p=0.035$ ), and all grade toxicity ( $p=0.024$ ).
