# Supplementary figures and images for: Clinical activity of PD-1 inhibition in the treatment of locally advanced or metastatic basal cell carcinoma
Source: PubMed Central journal article supplement — J Immunother Cancer. 2022 May 11;10(5):e004839. doi: 10.1136/jitc-2022-004839 (PMC9096532; doi:10.1136/jitc-2022-004839), 2022-05-11

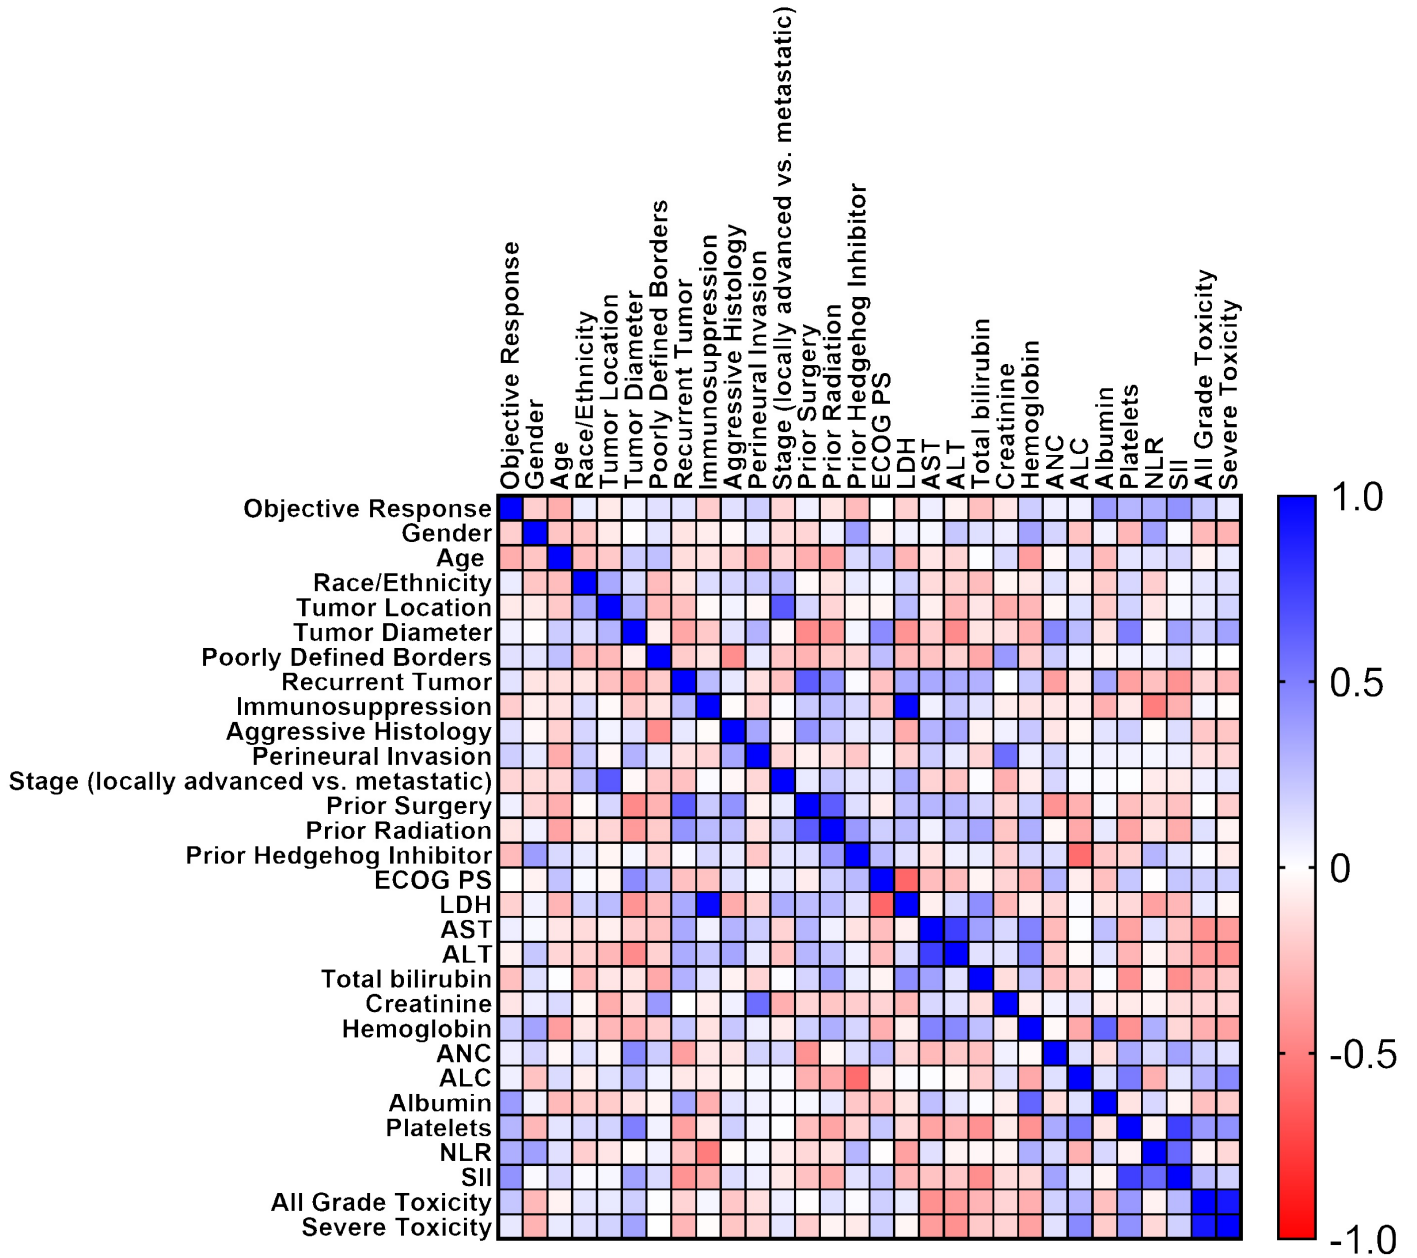

Supplement: jitc-2022-004839supp001.pdf [file jitc-2022-004839supp001.pdf]

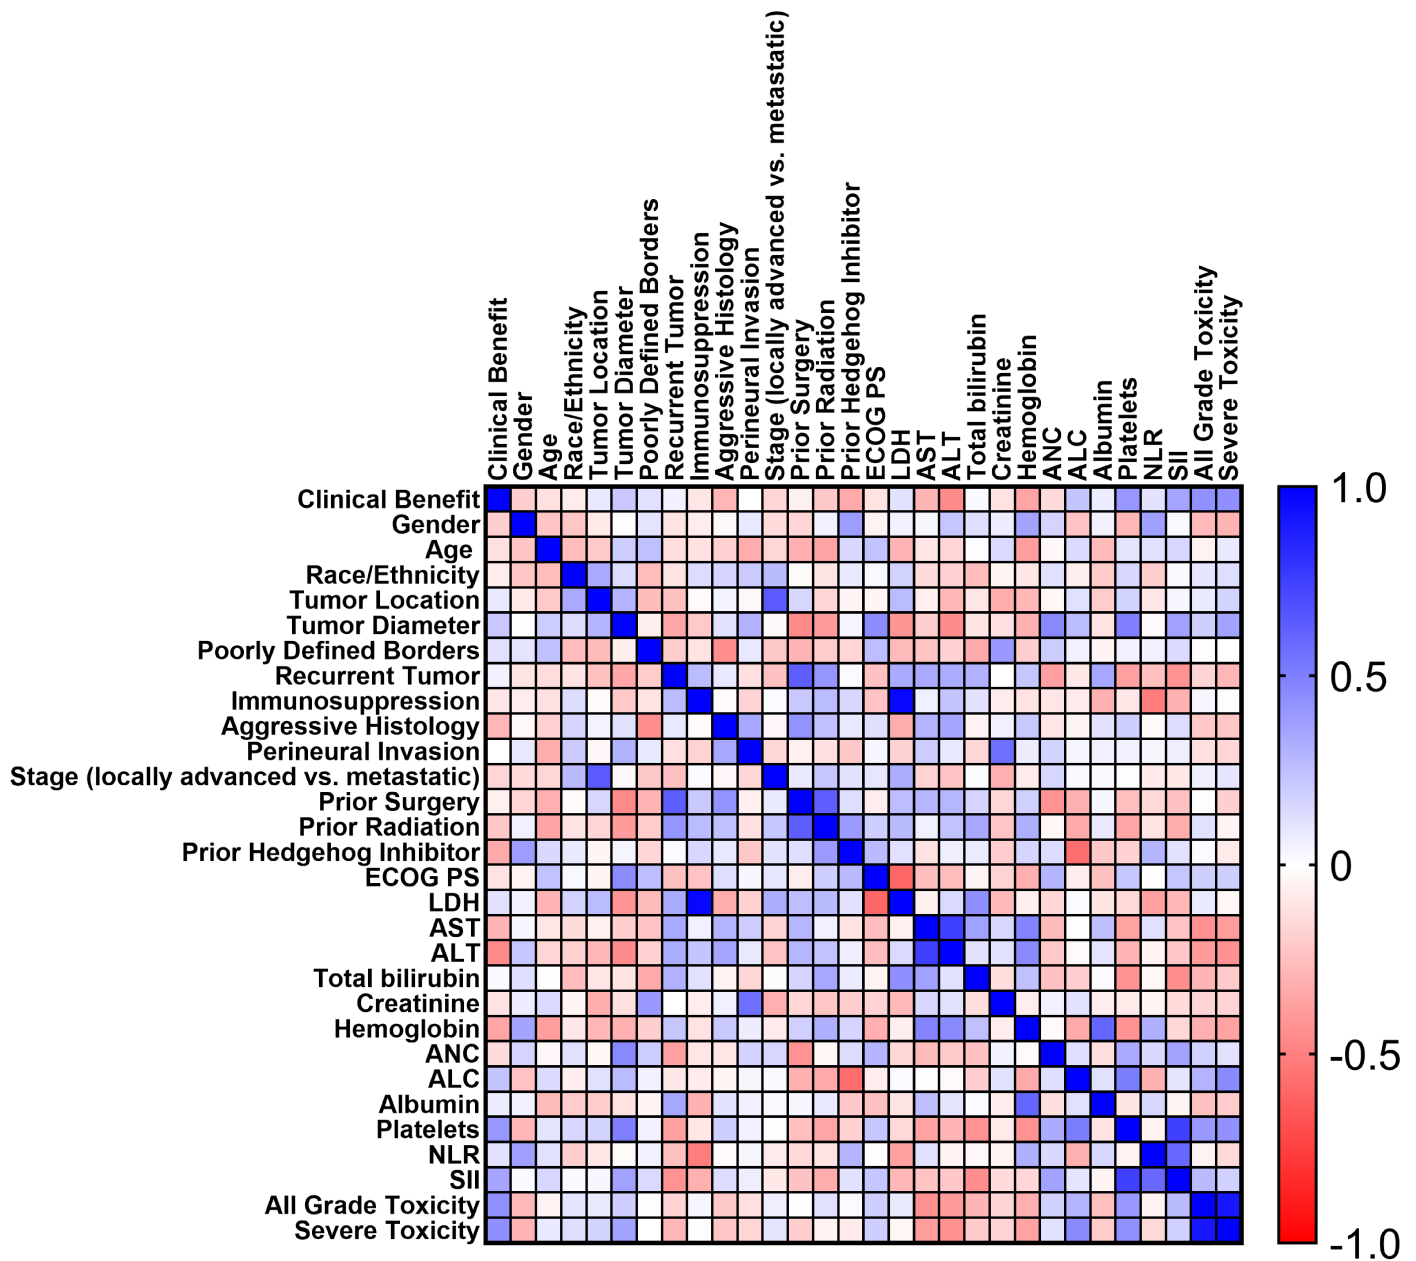

Supplement: jitc-2022-004839supp002.pdf [file jitc-2022-004839supp002.pdf]
